# Supplementary material
Source: Springer Nature journal article supplement (https://www.springermedizin.de/resource/supplementary/12865_2008_255_MOESM3_ESM.pdf/9427610)

### (a) Adult DCs

#### CCR-1

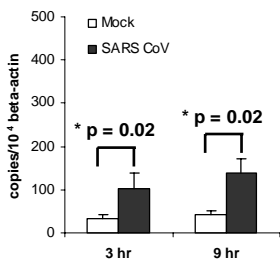

#### CCR-3

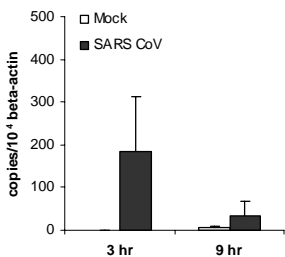

#### CCR-5

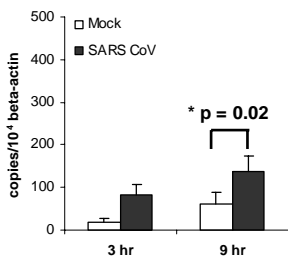

#### CCR-7

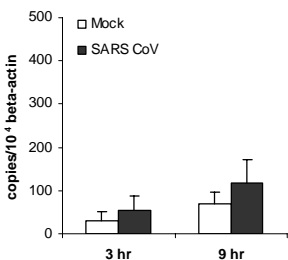

### (b) CB DCs

#### CCR-1

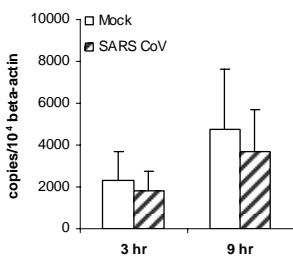

#### CCR-3

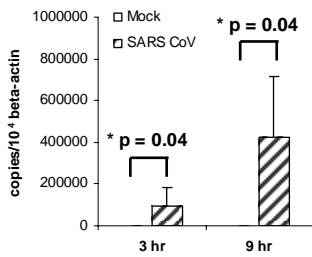

#### CCR-5

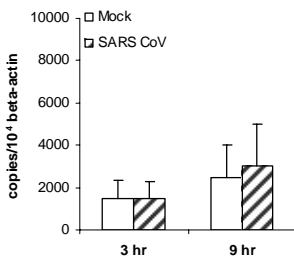

#### CCR-7

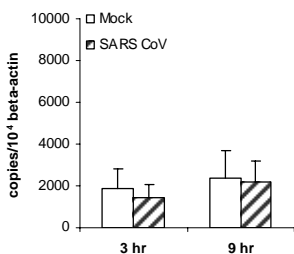

Supplement: MOESM3 [file 9427610]
